# Supplementary material
Source: MDPI journal article supplement (https://www.mdpi.com/2311-7524/10/5/514)
Supplement: s1 [file s1]

## Exploring the potential of biostimulants to optimize lettuce cultivation in coupled and decoupled aquaponics systems: growth performance, functional characteristics and metabolomic analysis

Chandrou et al.

**Table S1:** The parameters derived from the fast JIP fluorescence induction with their explanations and equations, according to Strasser et al. (2000). The secondary parameters presented in Figure 3 are bolded.

| Parameter                                                                                                                   | Explanation                                                                                                 |
|-----------------------------------------------------------------------------------------------------------------------------|-------------------------------------------------------------------------------------------------------------|
| $F_o = F_{50\mu s}$                                                                                                         | The initial value of the fluorescence. This is the first reliable fluorescence value after the illumination |
| $F_{300\mu s}, F_J, F_I$                                                                                                    | The fluorescence values at 300 $\mu s$ , 2ms and 30ms respectively                                          |
| $F_M$                                                                                                                       | The maximum value of fluorescence. This is the maximum level of OJIP curve                                  |
| Area                                                                                                                        | Area between from fluorescence induction (OJIP) curve to maximal fluorescence $F_M$                         |
| $S_m = \text{Area} - F_V$                                                                                                   | Normalized total complementary area above the OJIP transient                                                |
| $F_V = F_M - F_o$                                                                                                           | Variable chl fluorescence                                                                                   |
| $F_V/F_M$                                                                                                                   | Maximal quantum yield of PSII photochemistry                                                                |
| $M_o = 4 (F_{300\mu s} - F_o)/(F_M - F_o)$                                                                                  | The initial slope (in $ms^{-1}$ ) of relative variable chl fluorescence curve (for $F_o = F_{50\mu s}$ )    |
| $V_J = (F_{2ms} - F_o)/(F_M - F_o)$                                                                                         | Relative variable fluorescence at 2ms - point J of OJIP curve                                               |
| $V_I = (F_{30ms} - F_o)/(F_M - F_o)$                                                                                        | Relative variable fluorescence at 30ms - point I of OJIP curve                                              |
| $\phi E_o = ET_o / ABS = \phi P_o \cdot \psi E_o = 1 - F_J / F_M$                                                           | Quantum yield of electron transport to intermediate acceptors                                               |
| $\phi R_o = \phi P_o \cdot \psi E_o \cdot \delta R_o = 1 - F_I / F_M$                                                       | Quantum yield of electron transport to final acceptors                                                      |
| $1 - V_I$                                                                                                                   | Yield of reactive centers of PSI                                                                            |
| $1/V_I$                                                                                                                     | Relative yield of final acceptors $e^-$ of PSI                                                              |
| $ABS/RC = (M_o / V_J) \cdot F_M / (F_M - F_o)$                                                                              | Absorption flux (for PSII antenna chls) per active reaction center (RC)                                     |
| $TR_o / RC = M_o / V_J$                                                                                                     | Trapped energy flux per active RC                                                                           |
| $DI_o / RC = (M_o / V_J) \cdot (F_o / F_V)$                                                                                 | Dissipated energy flux per active RC                                                                        |
| $PI_{total} = (RC/ABS) \cdot (\phi P_o / 1 - \phi P_o) \cdot (\psi E_o / 1 - \psi E_o) \cdot (\delta R_o / 1 - \delta R_o)$ | Index of total photosynthetic efficiency                                                                    |

**Table S2.** The metabolic profile of lettuce samples of the individual treatments. The analysis of metabolites was performed by GC-MS chromatography. The detected amount of each metabolite was assigned as the relative response (fi) of the compound compared to the adonitol (internal standard). Values represent the average of the four biological replicates. Different letters denote statistically significant differences between treatments ( $p \leq 0.05$ ).

| Chemical category | Compound      | CAP-BS1  | CAP-BS-2 | CAP     | DCAP-BS1 | DCAP-BS2 | DCA P  | HP-BS1 | HP-BS2  | HP     |
|-------------------|---------------|----------|----------|---------|----------|----------|--------|--------|---------|--------|
| Amino acids       | Alanine       | 0,0626a  | 0,251ab  | 0,256ab | 0,087a   | 0,126a   | 0,390b | 1,148c | 0,173ab | 0,161a |
|                   | Aspartic acid | 0,074abc | 0,079bc  | 0,137d  | 0,045ab  | 0,176d   | 0,204e | 0,105c | 0,158d  | 0,035a |

|                      |                       |              |              |               |              |              |               |              |               |               |
|----------------------|-----------------------|--------------|--------------|---------------|--------------|--------------|---------------|--------------|---------------|---------------|
|                      | GABA                  | 0,411<br>a   | 1,067<br>e   | 0,576c        | 0,821d       | 0,503b       | 0,808<br>d    | 0,411<br>a   | 0,473<br>b    | 0,461a<br>b   |
|                      | Glycine               | 0,137<br>abc | 0,158<br>bc  | 0,039a        | 0,087a<br>b  | 0,182c       | 0,155a<br>bc  | 0,163<br>bc  | 0,278<br>d    | 0,143<br>bc   |
|                      | Pyroglutamic acid     | 0,018<br>a   | 0,138<br>ab  | 0,047a        | 0,557c       | 0,288b       | 0,674c        | 0,110<br>ab  | 0,293<br>b    | 0,275<br>b    |
|                      | Serine                | 0,040<br>a   | 0,079<br>ab  | 0,137a<br>b   | 0,045a       | 0,1876<br>b  | 0,104a<br>b   | 0,176<br>ab  | 0,118a<br>b   | 0,036a        |
|                      | Threonine             | 0,028<br>a   | 0,079<br>bc  | 0,046<br>8a   | 0,045a       | 0,049a<br>b  | 0,152<br>d    | 0,054<br>ab  | 0,097c        | 0,218e        |
|                      | Valine                | 0,006<br>a   | 0,033<br>ab  | 0,039a<br>b   | 0,018a<br>b  | 0,151fg      | 0,164<br>g    | 0,072<br>cd  | 0,127e<br>f   | 0,096<br>de   |
|                      | β-Alanine             | 0,000<br>a   | 0,000<br>a   | 0,000a        | 0,019b       | 0,241f       | 0,081<br>d    | 0,055<br>c   | 0,149e        | 0,045c        |
| Organic acids        | Butyric acid          | 0,006<br>a   | 0,033<br>ab  | 0,018a        | 0,008a       | 0,142b       | 0,087a<br>b   | 0,043<br>ab  | 0,113a<br>b   | 0,098a<br>b   |
|                      | Citric acid           | 0,829<br>e   | 0,620<br>d   | 0,516c        | 0,177a       | 0,200a       | 0,322<br>b    | 0,221<br>a   | 0,187a        | 0,150a        |
|                      | Erythronic acid       | 0,051<br>ab  | 0,079<br>bc  | 0,284<br>d    | 0,045a       | 0,154d       | 0,148<br>d    | 0,053<br>ab  | 0,092c        | 0,063a<br>b   |
|                      | Erythro-Pentonic acid | 0,234<br>ab  | 0,270<br>ab  | 0,058a        | 0,127a       | 0,206a<br>b  | 0,481c        | 0,144<br>a   | 0,362<br>bc   | 0,122a        |
|                      | Fumaric acid          | 0,902<br>b   | 0,079<br>a   | 0,124a        | 0,091a       | 0,081a       | 0,291a        | 0,091<br>a   | 0,152a        | 0,044a        |
|                      | Gluconic acid         | 0,718<br>d   | 0,304<br>abc | 0,058a        | 0,185a<br>b  | 0,171a<br>b  | 0,559<br>bcd  | 0,841<br>d   | 0,687c<br>d   | 0,147a        |
|                      | Glutaconic acid       | 0,040<br>a   | 0,079<br>c   | 0,058a<br>bc  | 0,045a       | 0,048a<br>b  | 0,075<br>bc   | 0,084<br>c   | 0,151<br>d    | 0,035a        |
|                      | Glyceric acid         | 32,86<br>8c  | 32,48<br>1c  | 25,79<br>4bc  | 19,265<br>ab | 25,026<br>bc | 24,77<br>8bc  | 20,72<br>0ab | 20,15<br>9ab  | 13,40<br>6a   |
|                      | Isocitric acid        | 0,372<br>bcd | 0,436<br>de  | 0,499e        | 0,302a<br>b  | 0,324a<br>bc | 0,507e        | 0,391<br>cd  | 0,328a<br>bc  | 0,275a        |
|                      | Lactic acid           | 0,109<br>a   | 0,159<br>ab  | 0,087a        | 0,177b       | 0,154a<br>b  | 0,150a<br>b   | 0,188<br>b   | 0,295c        | 0,154a<br>b   |
|                      | Malic acid            | 30,16<br>6ab | 38,14<br>5cd | 24,91<br>1a   | 35,699<br>bc | 53,092<br>e  | 42,09<br>9d   | 33,78<br>5bc | 30,30<br>5ab  | 25,84<br>4a   |
|                      | Malonic acid          | 0,040<br>a   | 0,033<br>a   | 0,018a        | 0,023a       | 0,117b<br>c  | 0,073a<br>b   | 0,053<br>a   | 0,147c        | 0,036a        |
|                      | Oxalic acid           | 0,878<br>b   | 0,297<br>a   | 0,353a        | 0,177a       | 0,237a       | 0,272a        | 0,732<br>b   | 0,360a        | 0,072a        |
|                      | Ribonic acid          | 0,063<br>a   | 0,079<br>ab  | 0,076a<br>b   | 0,045a       | 0,191a<br>b  | 0,281<br>b    | 0,055<br>a   | 0,097a<br>b   | 0,035a        |
|                      | Succinic acid         | 1,273<br>e   | 0,804<br>d   | 0,723<br>d    | 0,367a<br>bc | 0,480c       | 0,672<br>d    | 0,256<br>ab  | 0,416<br>bc   | 0,169a        |
|                      | Tartaric acid         | 0,040<br>a   | 0,079<br>bc  | 0,058a<br>b   | 0,045a       | 0,150d       | 0,154<br>d    | 0,052<br>ab  | 0,097c        | 0,071a<br>bc  |
|                      | Threonic acid         | 0,131<br>cd  | 0,159<br>de  | 0,137c<br>de  | 0,083b<br>c  | 0,052a<br>b  | 0,180e        | 0,084<br>bc  | 0,106c<br>d   | 0,011a        |
| Water-soluble Sugars | Arabinose             | 0,063<br>ab  | 0,079<br>ab  | 0,058a<br>b   | 0,023a       | 0,057a<br>b  | 0,144c        | 0,070<br>ab  | 0,109<br>bc   | 0,035a        |
|                      | Fructose              | 108,9<br>97a | 156,8<br>40d | 143,3<br>01cd | 158,09<br>1d | 300,44<br>8f | 131,2<br>44bc | 206,8<br>60e | 118,5<br>43ab | 152,5<br>33d  |
|                      | Galactose             | 5,450<br>d   | 5,458<br>d   | 1,952a<br>b   | 1,003a       | 4,341c       | 2,882a<br>bc  | 3,259<br>bc  | 7,695e        | 1,223a<br>b   |
|                      | Glucose               | 112,5<br>48a | 149,0<br>58c | 134,7<br>70bc | 151,93<br>4c | 330,74<br>6e | 129,1<br>90ab | 199,4<br>12d | 113,6<br>47a  | 139,5<br>94bc |
|                      | Maltose               | 0,131<br>b   | 0,205<br>b   | 0,132<br>b    | 0,147b       | 0,340c       | 0,179<br>b    | 0,053<br>a   | 0,169<br>b    | 0,059a        |

|                |                    |             |              |             |             |             |              |              |             |              |
|----------------|--------------------|-------------|--------------|-------------|-------------|-------------|--------------|--------------|-------------|--------------|
|                | Mannose            | 0,255<br>b  | 0,487<br>e   | 0,286<br>b  | 0,217a      | 0,375c      | 0,356c       | 0,410<br>d   | 0,625f      | 0,198a       |
|                | Mannose-6-deoxy    | 0,898<br>a  | 1,402<br>b   | 1,387<br>b  | 2,002c      | 1,481b      | 1,297a<br>b  | 2,443<br>d   | 1,436<br>b  | 1,589<br>bc  |
|                | Ribofuranose       | 0,028<br>a  | 0,033<br>a   | 0,047a      | 0,008a      | 0,151c      | 0,097<br>b   | 0,053<br>a   | 0,037a      | 0,034a       |
|                | Ribose             | 0,269<br>bc | 0,251<br>bc  | 0,284c      | 0,140a      | 0,254b<br>c | 0,358<br>d   | 0,218<br>b   | 0,265<br>bc | 0,154a       |
|                | Sedoheptulos<br>e  | 0,086<br>ab | 0,079<br>ab  | 0,105<br>b  | 0,045a      | 0,084a<br>b | 0,079a<br>b  | 0,085<br>ab  | 0,165c      | 0,059a       |
|                | Sucrose            | 58,77<br>2c | 63,28<br>4c  | 88,93<br>7d | 40,147<br>b | 56,510<br>c | 36,87<br>6ab | 34,89<br>2ab | 30,28<br>7a | 31,36<br>8a  |
|                | Tagatofurano<br>se | 0,320<br>bc | 0,549<br>d   | 0,586<br>d  | 0,183a      | 0,360b<br>c | 0,419c       | 0,251<br>ab  | 0,230a<br>b | 0,328<br>bc  |
|                | Talopyranose       | 0,000<br>a  | 0,079<br>c   | 0,000a      | 0,045b      | 0,084c      | 0,149<br>d   | 0,085<br>c   | 0,151<br>d  | 0,047<br>b   |
|                | Threose            | 0,040<br>ab | 0,057<br>b   | 0,018a      | 0,045a<br>b | 0,101c      | 0,105c       | 0,051<br>ab  | 0,090c      | 0,021a       |
|                | Xylose             | 0,103<br>a  | 0,158<br>abc | 0,115a      | 0,088a      | 0,131a<br>b | 0,267c       | 0,166<br>abc | 0,239<br>bc | 1,226<br>d   |
| Sugar alcohols | Glycerol           | 0,623<br>a  | 0,988<br>bc  | 0,695a      | 0,880b<br>c | 1,987f      | 1,487e       | 1,017<br>c   | 1,181<br>d  | 0,847<br>b   |
|                | meso-Erythritol    | 0,233<br>c  | 0,125<br>ab  | 0,116a<br>b | 0,061a<br>b | 0,092a<br>b | 0,098a<br>b  | 0,086<br>ab  | 0,154<br>bc | 0,037a       |
|                | Myo-Inositol       | 8,023<br>e  | 8,376<br>e   | 8,211e      | 4,876d      | 4,712c<br>d | 2,837a       | 4,453<br>cd  | 4,377<br>bc | 3,985<br>b   |
|                | Ribitol            | 0,006<br>a  | 0,033<br>ab  | 0,036a<br>b | 0,029a<br>b | 0,152d      | 0,042a<br>b  | 0,048<br>b   | 0,098c      | 0,032a<br>b  |
|                | Xylitol            | 0,086<br>ab | 0,079<br>ab  | 0,087a<br>b | 0,045a      | 0,119b      | 0,079a<br>b  | 0,102<br>b   | 0,096a<br>b | 0,065a<br>b  |
| Other          | Aucubin            | 0,154<br>ab | 0,091<br>a   | 0,077a      | 0,125a      | 0,261b      | 0,187a<br>b  | 0,168<br>ab  | 0,175a<br>b | 0,125a       |
|                | Phosphoric acid    | 0,000<br>a  | 0,000<br>a   | 0,000a      | 0,282d      | 0,417e      | 0,187c       | 0,121<br>b   | 0,150<br>b  | 0,200c       |
|                | Silanamine         | 1,062<br>a  | 2,114<br>cd  | 1,832<br>b  | 2,386ef     | 2,244d<br>e | 2,530f       | 2,260<br>de  | 1,907<br>bc | 2,165c<br>de |
